# Supplementary material for: Validation of a claims-based algorithm identifying eligible study subjects in the ADAPTABLE pragmatic clinical trial
Source: PubMed Central journal article supplement (PMC6240793; doi:10.1016/j.conctc.2018.11.001), 2018-11-10
Supplement: mmc2.pdf [file mmc2.pdf]

**Gender (Chart):**  Male  Female  Not Documented  
*Gender from medical record (choose one)*

**Date of Birth (Chart):**  /  /   
*DOB from medical record, MM/DD/YYYY*

---

## **SECTION 2: MEDICAL RECORD ELIGIBILITY**

*Timeframe: Chart Request Start Date to Chart Request End Date*

Place of service (select all that apply):

- Hospital (inpatient)*
- Emergency Department*
- None of the above (IF NONE OF THE ABOVE, END ABSTRACTION)*

Which of the following are included in the record (select all that apply):

- Hospital discharge summary*
  - Hospital admission summary with history*
  - Cardiologist consultation notes*
  - Emergency department discharge summary*
  - None of the above (IF NONE OF THE ABOVE, END ABSTRACTION)*
- 

## **SECTION 3: EVIDENCE OF ATHEROSCLEROTIC CARDIOVASCULAR DISEASE (ASCVD)**

*Timeframe: Chart Request Start Date to Chart Request End Date*

1. Does the patient have a history of myocardial infarction (MI)? *(See code list below)*

YES | NO | NOT DOCUMENTED

- If Yes, please provide the first page number in the chart where the information was found: \_\_\_\_\_

2. Does the patient have a history of a coronary artery bypass grafting (CABG)? *(See code list below)*

YES | NO | NOT DOCUMENTED

- If Yes, please provide the first page number in the chart where the information was found: \_\_\_\_\_

3. Does the patient have a history of percutaneous coronary intervention (PCI)? *(See code list below)*

YES | NO | NOT DOCUMENTED

- If Yes, please provide the first page number in the chart where the information was found: \_\_\_\_\_
- 

## **SECTION 4: EVIDENCE OF EXCLUSION FROM ADAPTABLE CLINICAL TRIAL**

*Time frame: Chart Start Date to Chart End Date*

4. Is there documentation of a history of allergy to aspirin?

YES | NO

- If Yes, please provide the first page number in the chart where the information was found: \_\_\_\_\_

5. Is there documentation of a history of significant gastrointestinal bleeding? *(See code list below)*

YES | NO

- If Yes, please provide the first page number in the chart where the information was found: \_\_\_\_\_

6. Is there documentation of any bleeding disorder that precludes the use of aspirin? (*See code list below*)

YES | NO

- If Yes, please provide the first page number in the chart where the information was found: \_\_\_\_\_

## **Appendix: Relevant diagnosis and procedure codes**

### Codes for myocardial infarction:

ICD-9 diagnosis codes

'41000', '41001', '41002', '41010', '41011', '41012', '41020', '41021', '41022', '41030', '41031', '41032', '41040', '41041', '41042', '41050', '41051', '41052', '41060', '41061', '41062', '41070', '41071', '41072', '41080', '41081', '41082', '41090', '41091', '41092', '412'

-or-

ICD-10 diagnosis codes

'I2101', 'I2102', 'I2109', 'I2111', 'I2119', 'I2121', 'I2129', 'I213', 'I214', 'I220', 'I221', 'I222', 'I228', 'I229', 'I252'

### Codes for CABG:

ICD-9 diagnosis code 'V4581'

or

ICD-10 diagnosis code 'Z951'

or

ICD-9 procedure codes '3610', '3611', '3612', '3613', '3614', '3615', '3616', '3617', '3619'

or

ICD-10 procedure codes '0210093', '0210098', '0210099', '021009C', '021009F', '021009W', '02100A3', '02100A8', '02100A9', '02100AC', '02100AF', '02100AW', '02100J3', '02100J8', '02100J9', '02100JC', '02100JF', '02100JW', '02100K3', '02100K8', '02100K9', '02100KC', '02100KF', '02100KW', '02100Z3', '02100Z8', '02100Z9', '02100ZC', '02100ZF', '0210344', '02103D4', '0210444', '0210493', '0210498', '0210499', '021049C', '021049F', '021049W', '02104A3', '02104A8', '02104A9', '02104AC', '02104AF', '02104AW', '02104D4', '02104J3', '02104J8', '02104J9', '02104JC', '02104JF', '02104JW', '02104K3', '02104K8', '02104K9', '02104KC', '02104KF', '02104KW', '02104Z3', '02104Z8', '02104Z9', '02104ZC', '02104ZF', '0211093', '0211098', '0211099', '021109C', '021109F', '021109W', '02110A3', '02110A8', '02110A9', '02110AC', '02110AF', '02110AW', '02110J3', '02110J8', '02110J9', '02110JC', '02110JF', '02110JW', '02110K3', '02110K8', '02110K9', '02110KC', '02110KF', '02110KW', '02110Z3', '02110Z8', '02110Z9', '02110ZC', '02110ZF', '0211344', '02113D4', '0211444', '0211493', '0211498', '0211499', '021149C', '021149F', '021149W', '02114A3', '02114A8', '02114A9', '02114AC', '02114AF', '02114AW', '02114D4', '02114J3', '02114J8', '02114J9', '02114JC', '02114JF', '02114JW', '02114K3', '02114K8', '02114K9', '02114KC', '02114KF', '02114KW', '02114Z3', '02114Z8', '02114Z9', '02114ZC', '02114ZF', '0212093', '0212098', '0212099', '021209C', '021209F', '021209W', '02120A3', '02120A8', '02120A9', '02120AC', '02120AF', '02120AW', '02120J3', '02120J8', '02120J9', '02120JC', '02120JF', '02120JW', '02120K3', '02120K8', '02120K9', '02120KC', '02120KF', '02120KW', '02120Z3', '02120Z8', '02120Z9', '02120ZC', '02120ZF', '0212344', '02123D4', '0212444', '0212493', '0212498', '0212499', '021249C', '021249F', '021249W', '02124A3', '02124A8', '02124A9', '02124AC', '02124AF', '02124AW', '02124D4', '02124J3', '02124J8', '02124J9', '02124JC', '02124JF', '02124JW', '02124K3', '02124K8', '02124K9', '02124KC', '02124KF', '02124KW', '02124Z3', '02124Z8', '02124Z9', '02124ZC', '02124ZF', '0213093', '0213098', '0213099', '021309C', '021309F', '021309W', '02130A3', '02130A8', '02130A9', '02130AC', '02130AF', '02130AW', '02130J3', '02130J8', '02130J9', '02130JC', '02130JF', '02130JW', '02130K3', '02130K8', '02130K9', '02130KC', '02130KF', '02130KW', '02130Z3', '02130Z8', '02130Z9', '02130ZC', '02130ZF', '0213344', '02133D4', '0213444', '0213493', '0213498', '0213499', '021349C', '021349F', '021349W', '02134A3', '02134A8', '02134A9', '02134AC', '02134AF', '02134AW', '02134D4', '02134J3', '02134J8', '02134J9', '02134JC', '02134JF',

'02134JW', '02134K3', '02134K8', '02134K9', '02134KC', '02134KF', '02134KW', '02134Z3', '02134Z8', '02134Z9',  
'02134ZC', '02134ZF'

or

CPT/HCPCS codes '33510', '33511', '33512', '33513', '33514', '33516', '33517', '33518', '33519', '33521', '33522',  
'33523', '33533', '33534', '33535', '33536'

Codes for PCI:

ICD-9 Diagnosis code V4582

or

ICD-10 Diagnosis code 'Z955', 'Z9861'

or

ICD-9 Procedure code '0066', '1755', '3601', '3602', '3605', '3606', '3607', '3609'

or

ICD-10 Procedure codes '0270046', '027004Z', '02700D6', '02700DZ', '02700T6', '02700TZ', '02700Z6', '02700ZZ',  
'0270346', '027034Z', '02703D6', '02703DZ', '02703T6', '02703TZ', '02703Z6', '02703ZZ', '0270446', '027044Z', '02704D6',  
'02704DZ', '02704T6', '02704TZ', '02704Z6', '02704ZZ', '0271046', '027104Z', '02710D6', '02710DZ', '02710T6', '02710TZ',  
'02710Z6', '02710ZZ', '0271346', '027134Z', '02713D6', '02713DZ', '02713T6', '02713TZ', '02713Z6', '02713ZZ', '0271446',  
'027144Z', '02714D6', '02714DZ', '02714T6', '02714TZ', '02714Z6', '02714ZZ', '0272046', '027204Z', '02720D6', '02720DZ',  
'02720T6', '02720TZ', '02720Z6', '02720ZZ', '0272346', '027234Z', '02723D6', '02723DZ', '02723T6', '02723TZ', '02723Z6',  
'02723ZZ', '0272446', '027244Z', '02724D6', '02724DZ', '02724T6', '02724TZ', '02724Z6', '02724ZZ', '0273046', '027304Z',  
'02730D6', '02730DZ', '02730T6', '02730TZ', '02730Z6', '02730ZZ', '0273346', '027334Z', '02733D6', '02733DZ', '02733T6',  
'02733TZ', '02733Z6', '02733ZZ', '0273446', '027344Z', '02734D6', '02734DZ', '02734T6', '02734TZ', '02734Z6', '02734ZZ',  
'02C03ZZ', '02C04ZZ', '02C13ZZ', '02C14ZZ', '02C23ZZ', '02C24ZZ', '02C33ZZ', '02C34ZZ', 'X2C0361', 'X2C1361'

or

CPT/HCPCS codes '92920', '92921', '92924', '92925', '92928', '92929', '92933', '92934', '92937', '92938', '92941',  
'92943', '92944', '92980', '92981', '92982', '92984', '92995', '92996', 'C9600', 'C9601', 'C9602', 'C9603', 'C9604', 'C9605',  
'C9606', 'C9607', 'C9608', 'G0290', 'G0291'

History of significant GI bleed

ICD-9 diagnosis codes

'53100', '53101', '53120', '53121', '53140', '53141', '53160', '53161', '53200', '53201', '53220', '53221', '53240', '53241',  
'53260', '53261', '53300', '53301', '53320', '53321', '53340', '53341', '53360', '53361', '53400', '53401', '53420', '53421',  
'53440', '53441', '53460', '53461', '5781', '5307', '4560', '45620', '53082', '5693', '5780', '5789'

-or-

ICD-10 diagnosis codes

'I8501', 'I8511', 'K226', 'K228', 'K250', 'K252', 'K254', 'K256', 'K260', 'K262', 'K264', 'K266', 'K270', 'K272', 'K274', 'K276',  
'K280', 'K282', 'K284', 'K286', 'K625', 'K920', 'K921', 'K922'

Bleeding disorder that precludes the use of aspirin

ICD-9 diagnosis code

'2860', '2861', '2862', '2863', '2864', '28652', '28653', '28659', '2866', '2867', '2869'

-or-

ICD-10 diagnosis code

'D65', 'D66', 'D67', 'D680', 'D681', 'D682', 'D68311', 'D68312', 'D68318', 'D6832', 'D684', 'D688', 'D689'
